# Supplementary material
Source: ML conference proceedings conference paper supplement (https://openreview.net/forum?id=BcNonfQ3RY)
Supplement: supplementary_material [file attachment]

---

# [Re] Lifting 2D StyleGAN for 3D-Aware Face Generation

## Supplementary Material

---

Anonymous Author(s)

Affiliation

Address

email

### 1 Supplementary Material

This document contains supplementary examples of our reproduction study. More examples are provided in our repository. Our implementation, the trained weights and more examples are open-sourced, and can be found at: <https://anonymous.4open.science/r/lifting-2d-stylegan-for-3d-aware-face-generation-4B11>

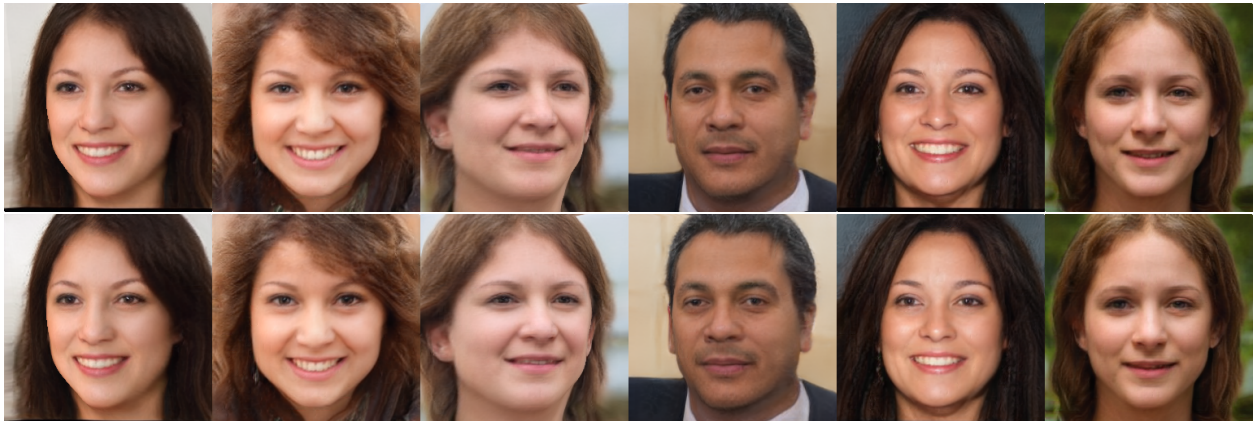

Figure 1: Face generation example on FFHQ dataset. The first row is the results produced by the original weights, the second row is the results produced by our reproduced weights.

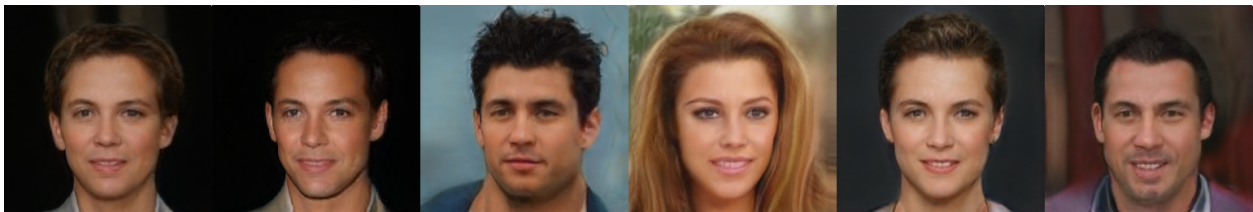

Figure 2: Face generation example on CelebA dataset.

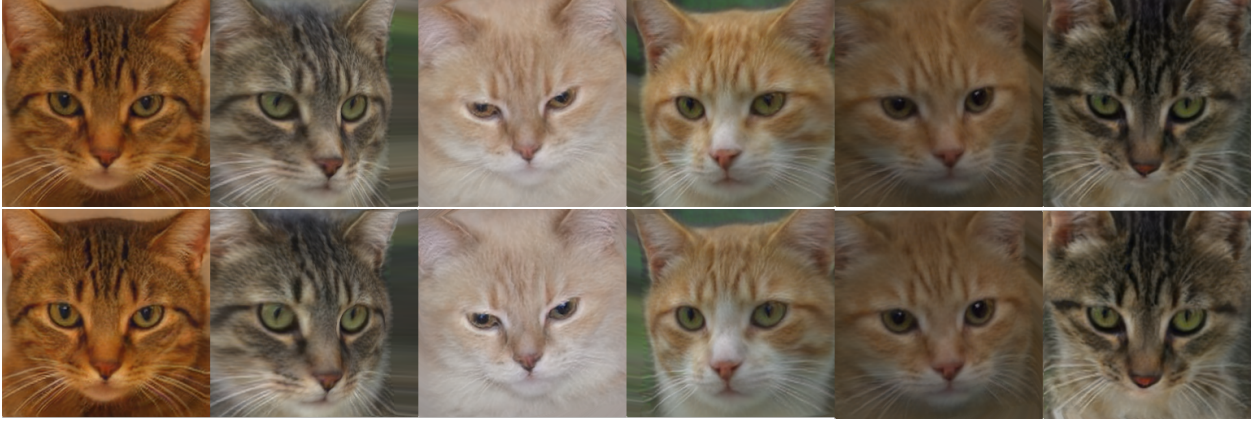

Figure 3: Face generation example on AFHQ Cat dataset. The first row is the results produced by the original weights, the second row is the results produced by our reproduced weights.

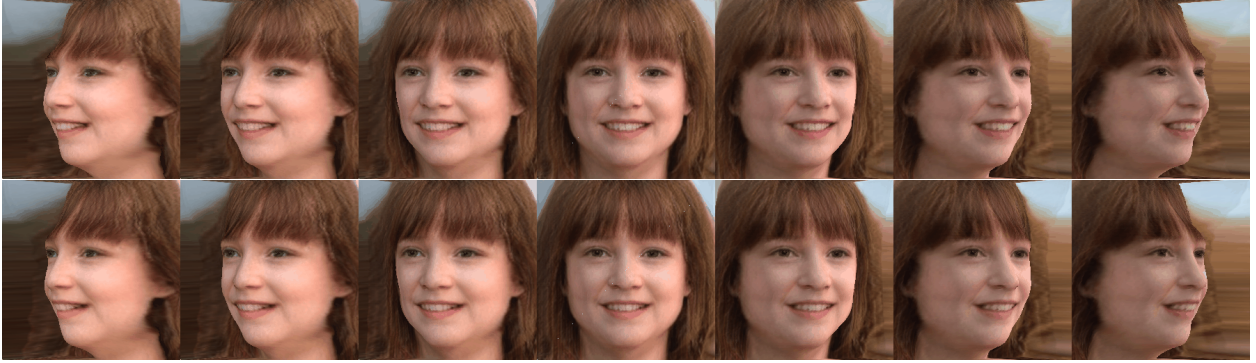

Figure 4: Viewpoint manipulation (yaw) example on FFHQ dataset. The first row is the results produced by the original weights, the second row is the results produced by our reproduced weights.

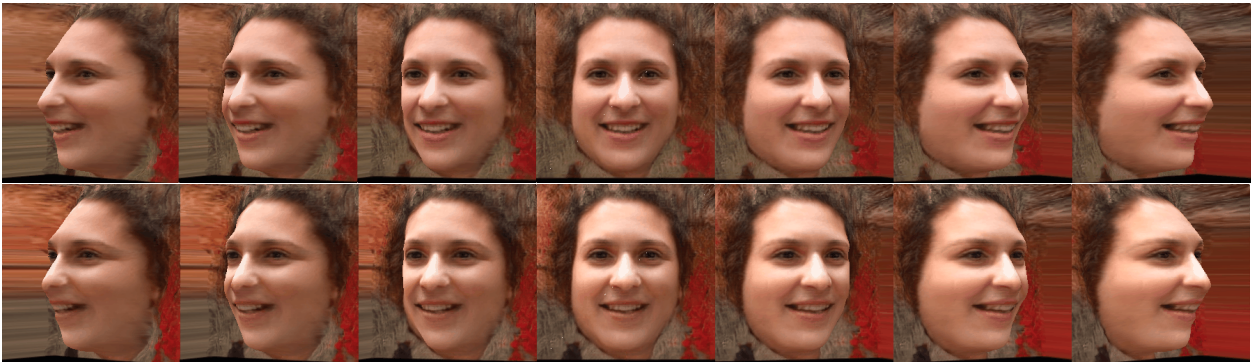

Figure 5: Viewpoint manipulation (yaw) example on FFHQ dataset. The first row is the results produced by the original weights, the second row is the results produced by our reproduced weights.

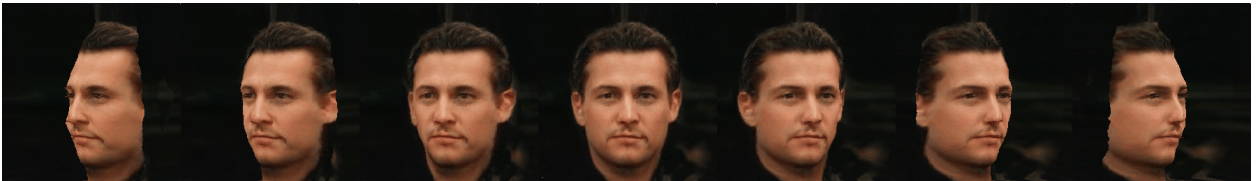

Figure 6: Viewpoint manipulation (yaw) example on CelebA dataset.



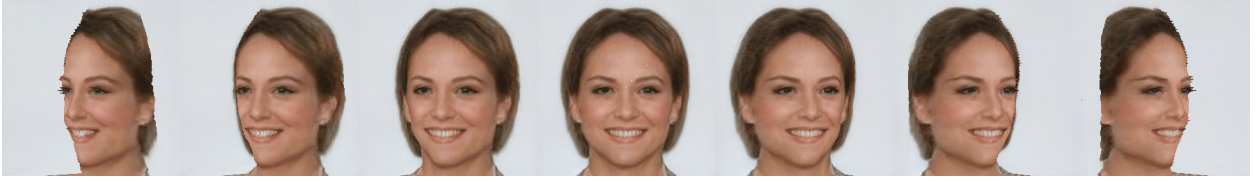

Figure 7: Viewpoint manipulation (yaw) example on CelebA dataset.

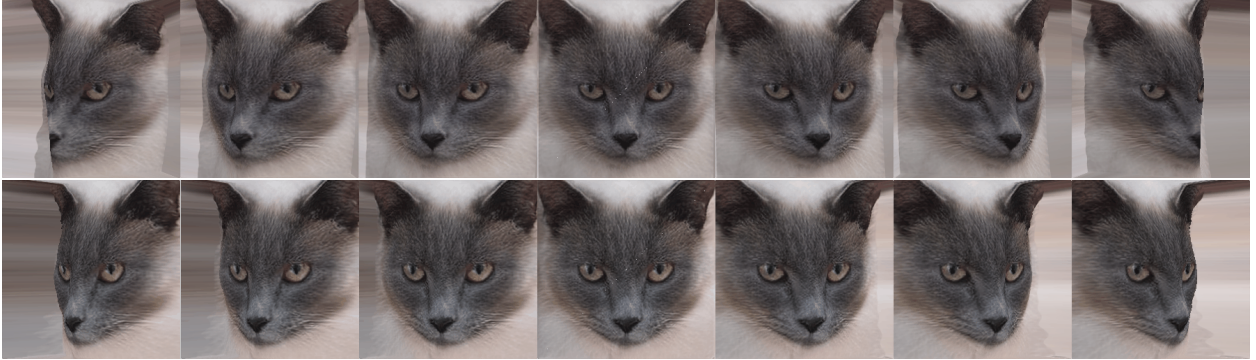

Figure 8: Viewpoint manipulation (yaw) example on AFHQ Cat dataset. The first row is the results produced by the original weights, the second row is the results produced by our reproduced weights.

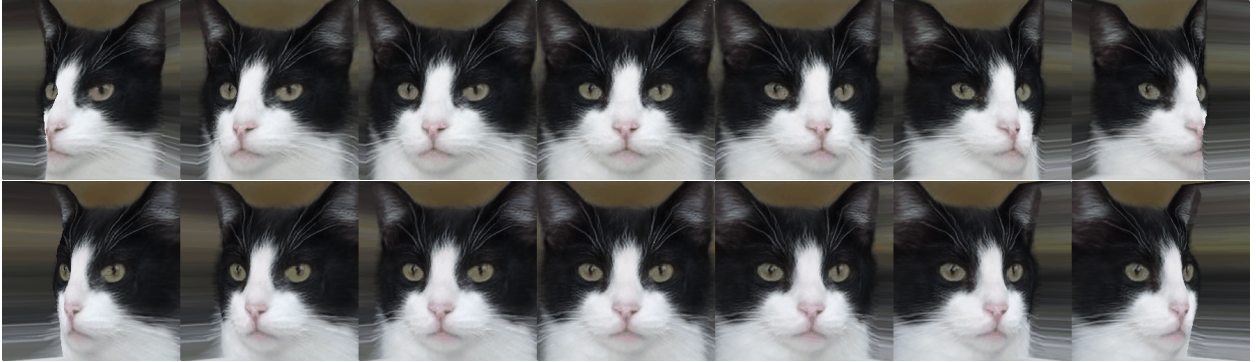

Figure 9: Viewpoint manipulation (yaw) example on AFHQ dataset. The first row is the results produced by the original weights, the second row is the results produced by our reproduced weights.

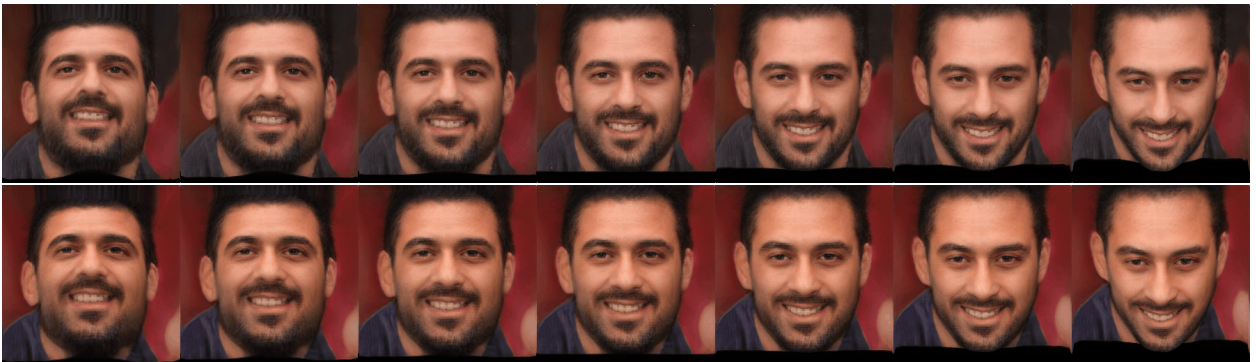

Figure 10: Viewpoint manipulation (pitch) example on FFHQ dataset. The first row is the results produced by the original weights, the second row is the results produced by our reproduced weights.



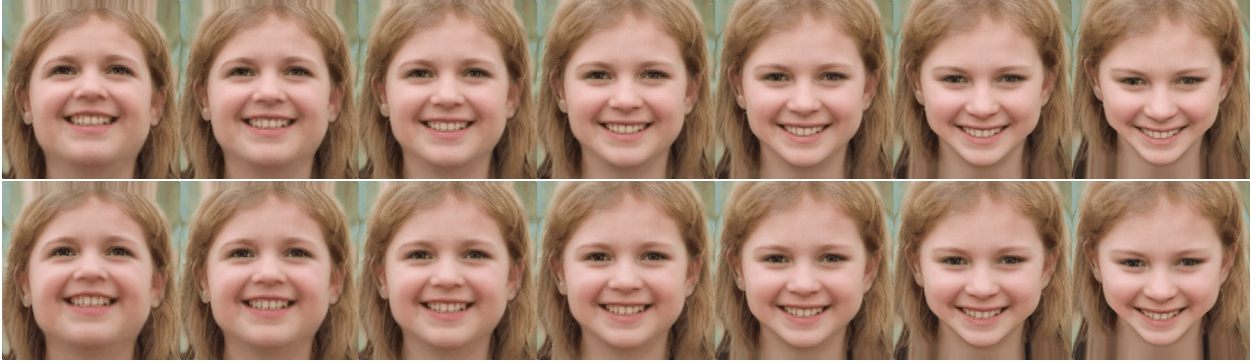

Figure 11: Viewpoint manipulation (pitch) example on FFHQ dataset. The first row is the results produced by the original weights, the second row is the results produced by our reproduced weights.

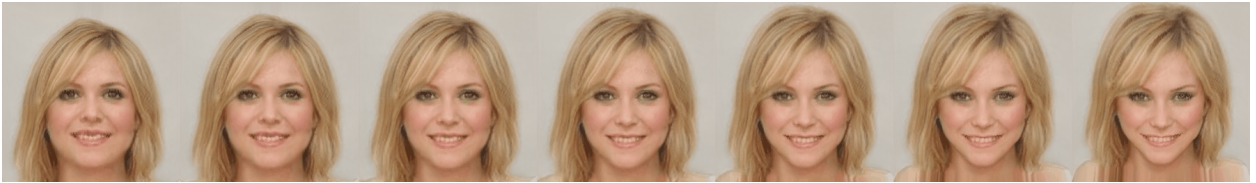

Figure 12: Viewpoint manipulation (pitch) example on CelebA dataset.

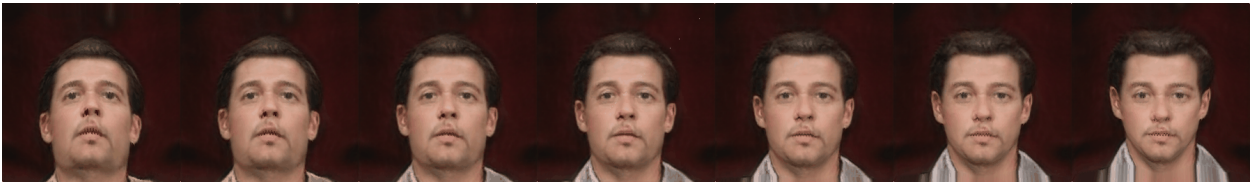

Figure 13: Viewpoint manipulation (pitch) example on CelebA dataset.

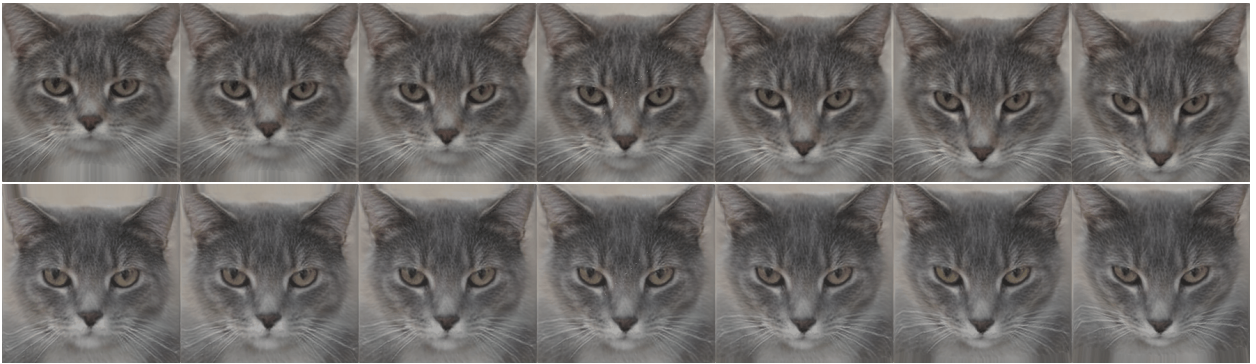

Figure 14: Viewpoint manipulation (pitch) example on AFHQ Cat dataset. The first row is the results produced by the original weights, the second row is the results produced by our reproduced weights.



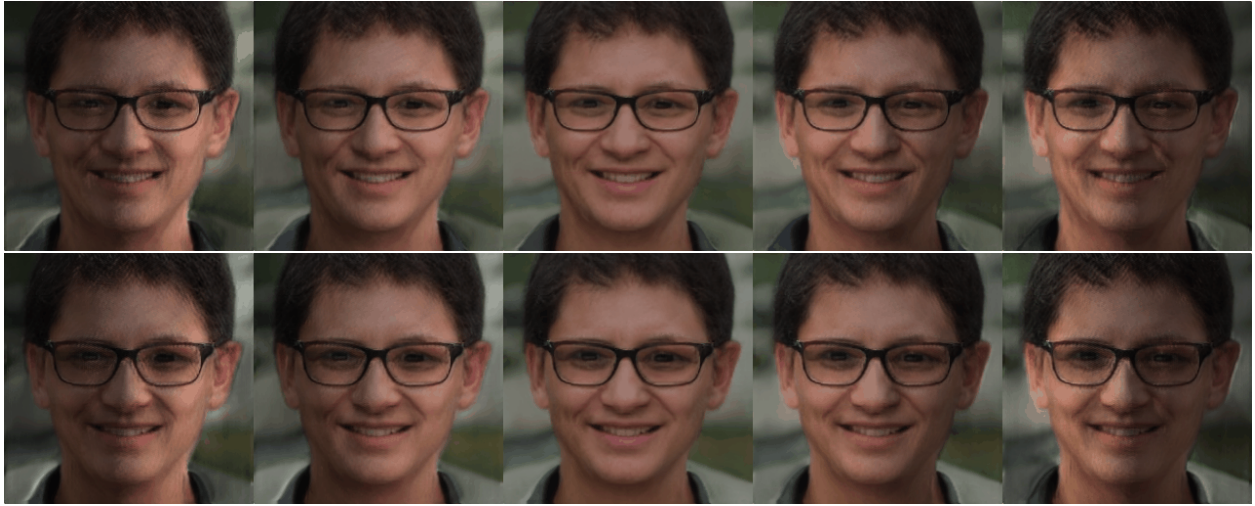

Figure 15: Light direction manipulation example on FFHQ dataset. The first row is the results produced by the original weights, the second row is the results produced by our reproduced weights.

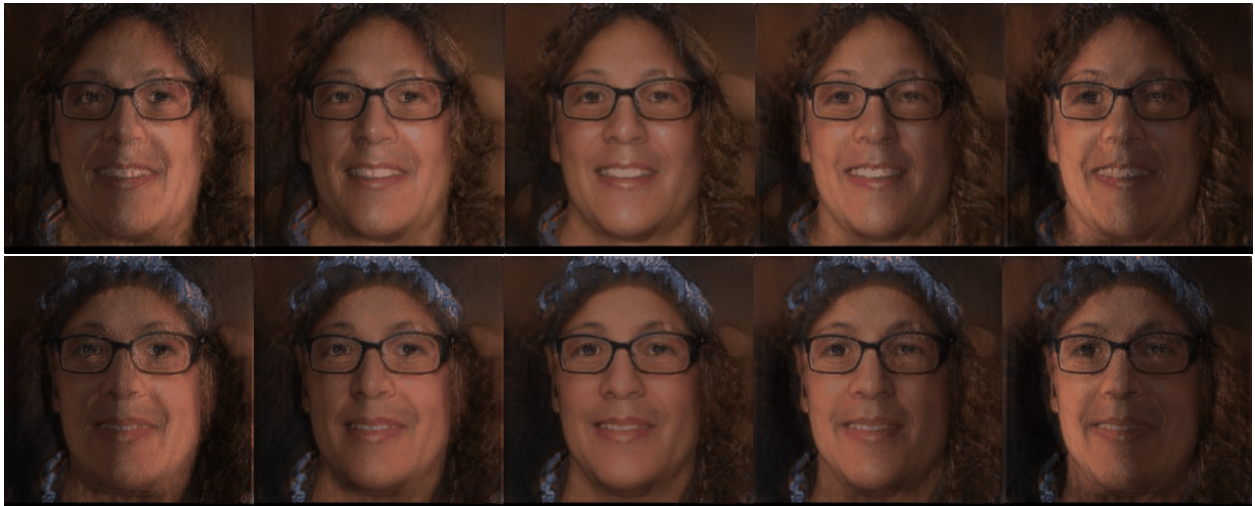

Figure 16: Light direction manipulation example on FFHQ dataset. The first row is the results produced by the original weights, the second row is the results produced by our reproduced weights.

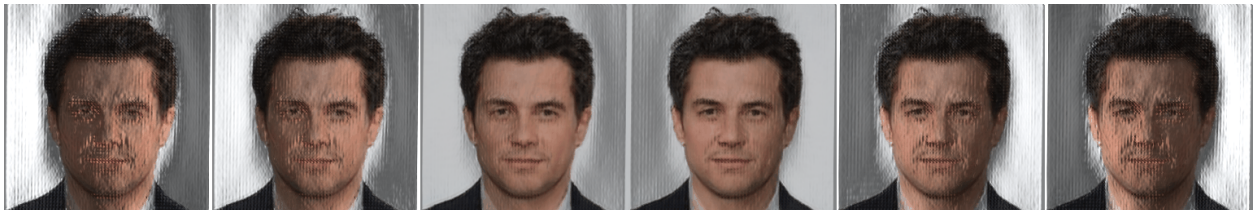

Figure 17: Light direction manipulation example on CelebA dataset.

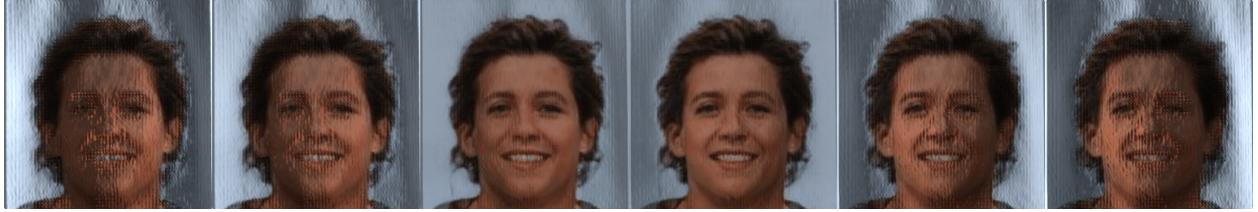

Figure 18: Light direction manipulation example on CelebA dataset.

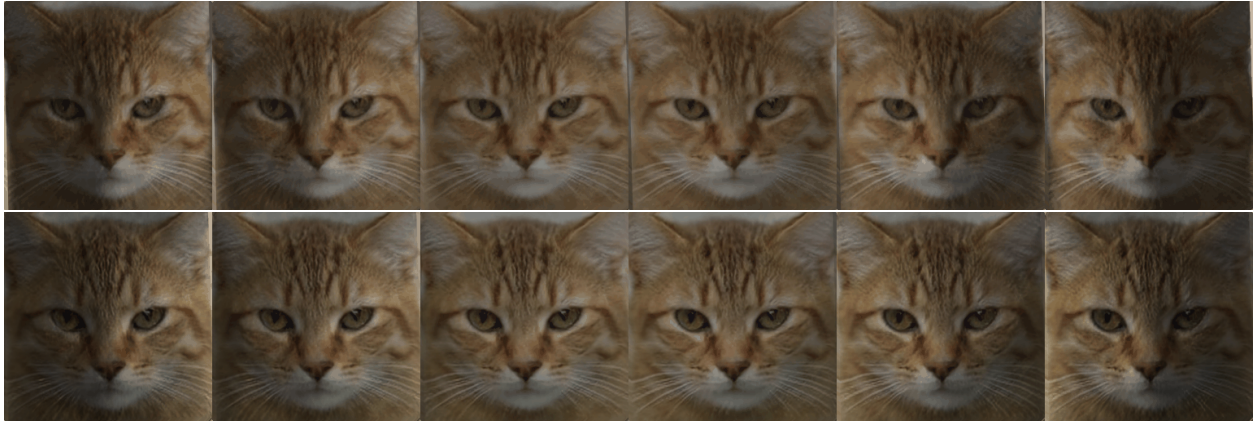

Figure 19: Light direction manipulation example on AFHQ Cat dataset. The first row is the results produced by the original weights, the second row is the results produced by our reproduced weights.
